# Supplementary material for: Prediction of Molecular Mechanisms for LianXia NingXin Formula: A Network Pharmacology Study
Source: Front Physiol. 2018 May 8;9:489. doi: 10.3389/fphys.2018.00489 (PMC5952186; doi:10.3389/fphys.2018.00489)
Supplement: Supplementary file 8 [file Table_8.xlsx]

## Sheet: T8 M203 GO term results
Supplementary Table S8: The results of M203 GO term analysis
Category	Term	Count	%	PValue	Genes	List Total	Pop Hits	Pop Total	Fold Enrichment	Bonferroni	Benjamini	FDR
GOTERM_BP_DIRECT	GO:0044267~cellular protein metabolic process	16	0.409941	1.42317e-25	ODAM, APCS, SEMG1, SNCA, LYZ, CST3, MFGE8, ITM2B, APOA4, TTR, APOA1, FGA, GSN, TGFBI, LTF, NPPA	30	118	16792	75.896	5.69268e-23	5.69268e-23	1.98504e-22
GOTERM_BP_DIRECT	GO:0019731~antibacterial humoral response	3	0.076864	0.00260459	SEMG1, SEMG2, LTF	30	44	16792	38.1636	0.647673	0.406428	3.57227
GOTERM_BP_DIRECT	GO:0050817~coagulation	2	0.0512426	0.00345115	SEMG1, SEMG2	30	2	16792	559.733	0.749136	0.369315	4.70759
GOTERM_BP_DIRECT	GO:0001523~retinoid metabolic process	3	0.076864	0.00494784	APOA4, TTR, APOA1	30	61	16792	27.5279	0.862489	0.391046	6.68451
GOTERM_BP_DIRECT	GO:1900005~positive regulation of serine-type endopeptidase activity	2	0.0512426	0.0051724	SEMG1, SEMG2	30	3	16792	373.156	0.87436	0.339571	6.97782
GOTERM_BP_DIRECT	GO:0030300~regulation of intestinal cholesterol absorption	2	0.0512426	0.00860631	APOA4, APOA1	30	5	16792	223.893	0.968489	0.437991	11.3577
GOTERM_BP_DIRECT	GO:1901318~negative regulation of sperm motility	2	0.0512426	0.00860631	SEMG1, SEMG2	30	5	16792	223.893	0.968489	0.437991	11.3577
GOTERM_BP_DIRECT	GO:0048525~negative regulation of viral process	2	0.0512426	0.010319	APCS, LTF	30	6	16792	186.578	0.98422	0.447178	13.4699
GOTERM_BP_DIRECT	GO:0034380~high-density lipoprotein particle assembly	2	0.0512426	0.0137357	APOA4, APOA1	30	8	16792	139.933	0.996043	0.499199	17.5448
GOTERM_BP_DIRECT	GO:0031102~neuron projection regeneration	2	0.0512426	0.0137357	APOA4, APOA1	30	8	16792	139.933	0.996043	0.499199	17.5448
GOTERM_BP_DIRECT	GO:0010898~positive regulation of triglyceride catabolic process	2	0.0512426	0.0137357	APOA4, APOA1	30	8	16792	139.933	0.996043	0.499199	17.5448
GOTERM_BP_DIRECT	GO:0010873~positive regulation of cholesterol esterification	2	0.0512426	0.0154398	APOA4, APOA1	30	9	16792	124.385	0.998019	0.499209	19.5099
GOTERM_BP_DIRECT	GO:0070327~thyroid hormone transport	2	0.0512426	0.0154398	TTR, SERPINA7	30	9	16792	124.385	0.998019	0.499209	19.5099
GOTERM_BP_DIRECT	GO:0042158~lipoprotein biosynthetic process	2	0.0512426	0.0154398	APOA4, APOA1	30	9	16792	124.385	0.998019	0.499209	19.5099
GOTERM_BP_DIRECT	GO:0051006~positive regulation of lipoprotein lipase activity	2	0.0512426	0.0171411	APOA4, APOA1	30	10	16792	111.947	0.999008	0.49922	21.4282
GOTERM_BP_DIRECT	GO:0045723~positive regulation of fatty acid biosynthetic process	2	0.0512426	0.0171411	APOA4, APOA1	30	10	16792	111.947	0.999008	0.49922	21.4282
GOTERM_BP_DIRECT	GO:0010951~negative regulation of endopeptidase activity	3	0.076864	0.0184153	WFDC12, SERPINA7, A2ML1	30	121	16792	13.8777	0.99941	0.491296	22.8371
GOTERM_BP_DIRECT	GO:0043206~extracellular fibril organization	2	0.0512426	0.0205351	SNCA, CST3	30	12	16792	93.2889	0.999751	0.49924	25.1292
GOTERM_BP_DIRECT	GO:0033700~phospholipid efflux	2	0.0512426	0.0239178	APOA4, APOA1	30	14	16792	79.9619	0.999938	0.525207	28.6563
GOTERM_BP_DIRECT	GO:0034375~high-density lipoprotein particle remodeling	2	0.0512426	0.0256049	APOA4, APOA1	30	15	16792	74.6311	0.999969	0.523409	30.3572
GOTERM_BP_DIRECT	GO:0014898~cardiac muscle hypertrophy in response to stress	2	0.0512426	0.0256049	ATP2A2, NPPA	30	15	16792	74.6311	0.999969	0.523409	30.3572
GOTERM_BP_DIRECT	GO:0010460~positive regulation of heart rate	2	0.0512426	0.0289707	ATP2A2, NPPA	30	17	16792	65.851	0.999992	0.543407	33.6385
GOTERM_BP_DIRECT	GO:0046597~negative regulation of viral entry into host cell	2	0.0512426	0.0306494	APCS, GSN	30	18	16792	62.1926	0.999996	0.540778	35.2209
GOTERM_BP_DIRECT	GO:0043691~reverse cholesterol transport	2	0.0512426	0.0306494	APOA4, APOA1	30	18	16792	62.1926	0.999996	0.540778	35.2209
GOTERM_BP_DIRECT	GO:0002227~innate immune response in mucosa	2	0.0512426	0.0423219	APOA4, LTF	30	25	16792	44.7787	1	0.638501	45.2922
GOTERM_BP_DIRECT	GO:0033344~cholesterol efflux	2	0.0512426	0.0423219	APOA4, APOA1	30	25	16792	44.7787	1	0.638501	45.2922
GOTERM_BP_DIRECT	GO:0007155~cell adhesion	4	0.102485	0.0438356	ATP2A2, TGFBI, MFGE8, DPT	30	459	16792	4.87785	1	0.630691	46.486
GOTERM_BP_DIRECT	GO:0070328~triglyceride homeostasis	2	0.0512426	0.0439783	APOA4, APOA1	30	26	16792	43.0564	1	0.612033	46.5973
GOTERM_BP_DIRECT	GO:0030198~extracellular matrix organization	3	0.076864	0.0447791	TTR, FGA, TGFBI	30	196	16792	8.56735	1	0.599985	47.2179
